# Supplementary material for: Detoxification of Indole by an Indole-Induced Flavoprotein Oxygenase from Acinetobacter baumannii
Source: PubMed Central journal article supplement (PMC4577076; doi:10.1371/journal.pone.0138798), 2015-09-21
Supplement: pone.0138798.s005.pdf [file pone.0138798.s005.pdf]

## First HTH

## Second HTH

|                    |     |                                                                                                                                                                                                                                                  |                                                                                                                                                                    |          |
|--------------------|-----|--------------------------------------------------------------------------------------------------------------------------------------------------------------------------------------------------------------------------------------------------|--------------------------------------------------------------------------------------------------------------------------------------------------------------------|----------|
| <b>IiFR/Ab</b>     | 255 | VEI <b>L</b> AEHAGVSVR <b>T</b> L <b>F</b> TG <b>F</b> KNYL <b>G</b> TPMSYLKEL <b>R</b> FEQ <b>A</b> HLE <b>L</b> MHNEN <b>L</b> S                                                                                                               | <b>V</b> TD <b>V</b> AFKW <b>G</b> F <b>T</b> HLGR <b>F</b> SQ <b>E</b> Y <b>K</b> RRY <b>G</b> EL <b>P</b>                                                        | 332      |
| <b>IiFR/Ps</b>     | 252 | IEQ <b>L</b> AEHAGVSVR <b>T</b> L <b>F</b> SG <b>F</b> FRNT <b>S</b> PMA <b>F</b> LRHV <b>R</b> MER <b>V</b> HLE <b>L</b> LRN <b>P</b> GT <b>S</b>                                                                                               | <b>V</b> TD <b>I</b> AMKW <b>G</b> F <b>A</b> H <b>L</b> GR <b>F</b> SQ <b>E</b> Y <b>R</b> KHY <b>G</b> EL <b>P</b>                                               | 329      |
| <b>AraC/Ec</b>     | 197 | I <b>A</b> SV <b>A</b> QHVC <b>L</b> SP <b>S</b> RL <b>S</b> H <b>L</b> F <b>R</b> Q <b>L</b> G <b>I</b> SV <b>L</b> SW <b>R</b> ED <b>Q</b> RI <b>S</b> Q <b>A</b> K <b>L</b> L <b>L</b> S <b>T</b> TR <b>M</b>                                 | <b>P</b> I <b>A</b> TV <b>G</b> RNV <b>G</b> F <b>D</b> DD <b>Q</b> LY <b>F</b> SR <b>V</b> F <b>K</b> K <b>C</b> T <b>G</b> A <b>S</b> P                          | 273      |
| <b>XyIS/PP</b>     | 230 | LER <b>L</b> AE <b>L</b> AM <b>M</b> SP <b>R</b> S <b>L</b> Y <b>N</b> L <b>F</b> E <b>K</b> HAG <b>T</b> T <b>P</b> K <b>N</b> Y <b>I</b> R <b>N</b> R <b>K</b> L <b>E</b> S <b>I</b> R <b>A</b> C <b>L</b> ND <b>P</b> S <b>A</b> N <b>V</b> R | <b>S</b> I <b>T</b> E <b>I</b> A <b>L</b> D <b>Y</b> G <b>F</b> L <b>H</b> L <b>G</b> R <b>F</b> A <b>E</b> N <b>Y</b> R <b>S</b> A <b>F</b> G <b>E</b> L <b>P</b> | 309      |
| Consensus sequence |     | <b>A</b> ----- <b>S</b> --- <b>L</b> --- <b>F</b> ----- <b>G</b> ----- <b>R</b> --- <b>A</b> --- <b>L</b> -----                                                                                                                                  | <b>I</b> --- <b>I</b> --- <b>G</b> F----- <b>F</b> ----- <b>F</b> R--- <b>G</b> --- <b>P</b>                                                                       |          |
|                    |     | <b>v</b> <b>v</b>                                                                                                                                                                                                                                | <b>v</b> <b>y</b>                                                                                                                                                  | <b>k</b> |
